# Supplementary material for: The Morphology of the Rat Vibrissal Array: A Model for Quantifying Spatiotemporal Patterns of Whisker-Object Contact
Source: PLoS Comput Biol. 2011 Apr 7;7(4):e1001120. doi: 10.1371/journal.pcbi.1001120 (PMC3072363; doi:10.1371/journal.pcbi.1001120)
Supplement: Table S2 — All models tested for parameter-identity relationships. (0.05 MB DOC) [file pcbi.1001120.s005.doc]

**Table S2. All models tested for parameter-identity relationships**

|  | ***Fit Type:*** | ***Equation:*** |
| --- | --- | --- |
| Single identity parameter | Linear |  |
| Quadratic |  |
| Cubic |  |
| Rational (A) |  |
| Rational (B) |  |
| Power Law (A) |  |
| Power Law (B) |  |
| Exponential (A) |  |
| Exponential (B) |  |
| Exponential (C) |  |
| Two identity parameters | 2D Linear |  |
| 2D Quadratic (A) |  |
| 2D Quadratic (B) |  |
| 2D Quadratic (C) |  |

Note that in each equation for a single identity parameter, *col* could be replaced with *row*. *col:* column.
